# 1 Comparing Phoneme and Word 2 Recognition Test Outcomes in Adult CI 3 users: Data Analysis from the AuDieT 4 Study

5 Enrico Migliorini<sup>1,2</sup>, Jan-Willem A. Wasmann<sup>2</sup>, Nikki Philpott<sup>2</sup>, Bastiaan van Dijk<sup>3</sup>, Birgit  
6 Philips<sup>1</sup>, Wendy Huinck<sup>2</sup>

7 1) Cochlear Technology Centre Belgium, Mechelen, Belgium 2) Department of Otorhinolaryngology,  
8 Donders Institute for Brain, Cognition and Behaviour, Radboud university medical center Nijmegen,  
9 Nijmegen, The Netherlands 3) Cochlear Benelux NV, Mechelen, Belgium

## 10 Abstract

11 **Purpose:** Current clinical measures used in cochlear implantation (CI) provide a broader view of  
12 speech recognition ability at word-level, often missing granular details contained at phoneme-level  
13 that may be valuable for CI mapping. This study evaluates how outcomes of Phoneme Recognition in  
14 Quiet tests (PRQ) differ from those of more commonly used word recognition tests (CVC) and  
15 outlines how these tests may be useful for different purposes in clinical adult CI care.

16 **Methods:** As part of the AuDiET (Auditory Diagnostics and Error-based Treatment) study, 23 adult  
17 postlingually deafened unilateral CI users underwent a battery of tests, including both PRQ and CVC  
18 tests. Their results were compared at the phoneme level, including an evaluation of fitness and error  
19 dispersion.

**NOTE:** This preprint reports new research that has not been certified by peer review and should not be used to guide clinical practice.

20 **Results:** PRQ had a significantly lower accuracy and fitness than CVC. The error patterns also tended  
21 to be less random and more systematic. Fitness correlated strongly and positively with accuracy,  
22 while error dispersion negatively correlated with accuracy.

23 **Conclusion:** There are clear differences between PRQ and CVC outcomes in absolute accuracy and  
24 error distribution. Comparing these tests might provide clinicians with more granular insights into  
25 which areas/phonemes to target during mapping, to achieve optimal speech recognition.

## 26 Introduction

### 27 Background

28 The cochlear implant (CI) is a highly successful sensory neuro-prosthesis. Through electrical stimulation  
29 of the auditory nerve, a CI can partially restore hearing in people with severe to profound sensorineural  
30 hearing loss. Since its invention, it is estimated that more than a million hearing-impaired people  
31 worldwide have received a CI (Zeng, 2022). Adult CI users score an average of 70%-80% speech  
32 recognition in quiet when using the latest implants, sound processors, and coding strategies (Zeng,  
33 2022).

34 While this is an impressive result, some issues related to the post-implantation journey of CI users still  
35 need addressing. One of these is unexpectedly poor outcomes: cases in which a CI user achieves a  
36 much lower level than expected (Pisoni et al., 2017). There are multiple possible explanations for this  
37 variability: many of the factors which contribute to hearing, such as neural health in the spiral ganglion,  
38 are hard to measure precisely (Walia et al., 2023), the impact of various factors on performance seems  
39 to be variable (Blamey et al., 2013), and clinicians tend to overestimate the post-implantation  
40 performance of CI recipients based on pre-implantation data (Philpott, Philips, Donders, et al., 2023).

41 Clinical research tends to focus on good or exceptional outcomes (Moberly et al., 2016), resulting in an  
42 under-representation of people with poorer outcomes. There is a general lack of understanding on

43 how to address the issue of poor performance. This uncertainty affects the otherwise excellent cost-  
44 effectiveness of CIs (Bond et al., 2009), and uncertainty about the potential benefits may dissuade  
45 candidates from undergoing the implantation.

46 The issue of addressing CI users who show poor speech understanding is compounded by the lack of  
47 patient-specific, standardised treatment guidelines. Whether considering fitting (i.e., adjusting the  
48 parameters governing the electrical stimulation) or training (i.e., rehabilitative exercises aimed at  
49 improving speech recognition), clinical practices vary significantly across different clinics (Wathour et  
50 al., 2021). In clinical fitting procedures for the Cochlear Nucleus system, the two most important  
51 settings which are individually determined are T-levels (just audible electrical stimulation level) and C-  
52 levels (most comfortable electrical stimulation level). T-levels are determined using a threshold-  
53 seeking method, while C-levels are set based on a CI user's loudness rating. Most parameters other  
54 than T- and C-level are set to "default" (Vaerenberg et al., 2014). Surveys such as the aforementioned  
55 Vaerenberg et al., 2014 show significant variability in CI programming practices among clinicians and CI  
56 centres. The lack of standardised, evidence-based guidelines can lead different clinicians to adopt  
57 different approaches, although steps have been taken towards developing the Living Guidelines:  
58 consensus-based guidelines aimed at encouraging good clinical practices in clinics across the world.

59 While objective measures show a correlation with subjective threshold and comfort levels (de Vos et  
60 al., 2018), the correlation is, in general, weak; this means that the objective measures cannot be used  
61 to accurately predict T- and C-levels. However, it has been shown that creating MAPs based on either  
62 electrically evoked Compound Action Potential (eCAP) or electrically evoked Stapedius Reflex  
63 Threshold (eSRT) can lead to equivalent performance compared to behavioural subjective fitting  
64 (Craddock et al., 2003).

65 In recent years, several studies have been conducted aiming to develop individualised fitting and  
66 training interventions that take into account each participant's unique challenges. The investigation of

67 both fitting and training is important, as they represent different and complementary parts of the post-  
68 implantation journey of a CI user. Most of the studies attempting to define a new fitting paradigm focus  
69 on using objective, non-language-related measures to determine fitting levels: such tests may include  
70 electrode discrimination, pitch ranking or spectrotemporal sensitivity tests (Grasmeder et al., 2019;  
71 Van Opstal & Noordanus, 2023; Warren & Atcherson, 2023). Such “bottom-up” approaches stem from  
72 the assumption that fittings that provide well-audible stimuli across the full spectrum of covered  
73 frequencies would result in the best overall performance. Other approaches focus on imaging  
74 techniques, aiming to fit on the base of anatomical features, electrode positioning, and distance from  
75 the modiolus in order to leverage the tonotopic organization of the cochlea to prevent frequency drift  
76 due to misalignment of the electrode with the spiral ganglion cells (Jiam et al., 2019; Kurz et al., 2023)  
77 .

78 It is known that CI users react to different cues than people with typical hearing thresholds (Moberly et  
79 al., 2014), which implies that delivering electrical stimulation with the aim of reproducing the neural  
80 activity of a normal ear as accurately as possible (i.e., making it as faithful as possible to the actual  
81 sound) may be a suboptimal approach. Enhancing the cues that CI users rely on, instead, may lead to  
82 better speech understanding. However, there is a very limited number of studies concerning how  
83 analysing speech recognition outcomes may provide insight into CI fitting (Holmes et al., 2012;  
84 Wathour et al., 2023), several of which centre around the Fitting to Outcome eXperts (FOX; Otoconsult  
85 NV, Antwerp, Belgium) system, an Artificial Intelligence (AI)-based fitting tool. The generally positive  
86 outcome of papers relating to speech-based interventions suggests that there is merit to this approach:  
87 however, the details of the interventions’ implementations have not been published in their entirety  
88 due to both their commercial nature and, in the case of FOX, the intrinsically hard-to-understand  
89 nature of AI. Therefore, the question of how clinicians may draft interventions based on their patients’  
90 speech recognition outcomes remains partially unanswered.

91 As training interventions are complementary to fitting ones, it is worth mentioning how the concept of  
92 individualised auditory training has also been investigated: Magits et al. (Magits et al., 2023) reported  
93 similar effectiveness for personalised and non-personalised training programs, and in their literature  
94 review, Philpott et al. (Philpott, Philips, Tromp, et al., 2023) found variable effectiveness for both types  
95 of programs, although the personalisation of the training tended to refer to adaptive difficulty more  
96 than to a focus on the individual difficulties of each CI user. In this case, as well as investigating  
97 personalized fitting, we believed it worthwhile to evaluate whether personalized training based on the  
98 speech recognition issues of each CI user may be impactful.

99 The Auditory Diagnostics and Error-based Treatment (AuDiET) study was conceived as an investigation  
100 of the feasibility and effectiveness of individualised fitting and training interventions based on  
101 phoneme-level information on the participants' errors. Its goal was to provide details on how CI users  
102 experiencing different challenges in sound recognition, respond to interventions aimed at addressing  
103 those challenges. Should an investigation of errors in speech audiometry provide valuable resources  
104 upon which fitting and training interventions may be based, this could lead the way towards a new  
105 approach to post-implantation clinical care. It may provide opportunities where users may test their  
106 hearing performance on their own between visits (apps for remote testing with self-administered  
107 procedures are already available, with varying degrees of functionality and validity (Wasmann et al.,  
108 2024)) and detailed information on their errors could be relayed to their clinicians for use in their  
109 follow-up.

110 In this paper we investigate whether there are significant differences in errors and error patterns when  
111 comparing the results of phoneme tests and word tests (as described in the Methods section). Next,  
112 differences between these tests are analysed to find out which test is better suited for designing  
113 interventions. This will be done by analysing their correlation scores, highlighting differences in  
114 accuracy scores, and dispersion both within participants and between the two different tests. Potential  
115 explanations for the presented results will be considered in the Discussion section.

## 116 Methods

### 117 Study design

118 In the AuDiET study, each participant undergoes five clinical visits. During Visit 1, baseline data is  
119 collected; during Visit 2, a fitting intervention is administered to the participant; during Visit 3 (set 2  
120 weeks after Visit 2) the effects of the fitting intervention are evaluated, and the participant is given a  
121 personalised training programme; during Visit 4 (set 4 weeks after Visit 3) the training intervention is  
122 evaluated, and the participant stops training; finally, during Visit 5 (set 4 weeks after Visit 4) the  
123 retention of any effects is evaluated.

124 The AuDiET study itself is structured as a pre-post comparison; the analysis presented in this paper,  
125 however, is limited to the pre-intervention data collected from the study population. The study  
126 population is comprised of 23 (27 were recruited, 4 of which dropped out of the study or were excluded  
127 due to unforeseen technical issues) native Dutch-speaking adult CI users with a post-lingual onset of  
128 hearing loss and unilaterally implanted with a Cochlear® Nucleus™ implant model. The details of the  
129 population are highlighted in Table 1. All participants had at least one year of CI experience.  
130 Participants with abnormally formed cochleae, severe pre-implantation ossification, severe cognitive  
131 disorders, intense facial nerve stimulation, unaddressed tip fold-over or more than 4 malfunctioning  
132 electrodes were ineligible for the study.

133 *Table 1: Information on the study population. 'S' stands for 'Subject', 'M' for 'Male', 'F' for 'Female'*

| <b>Subject No.</b> | <b>Age at inclusion<br/>(years range)</b> | <b>Gender</b> | <b>CI experience<br/>(y)</b> | <b>Implant<br/>type</b> | <b>Etiology</b>                 |
|--------------------|-------------------------------------------|---------------|------------------------------|-------------------------|---------------------------------|
| S01                | 61-65                                     | M             | 5                            | CI522                   | Idiopathic                      |
| S02                | 71-75                                     | M             | 7                            | CI512                   | Family history,<br>otosclerosis |

|                   |       |   |    |        |                                |
|-------------------|-------|---|----|--------|--------------------------------|
| S03<br>(excluded) | -     | - | -  |        |                                |
| S04               | 66-70 | F | 4  | CI522  | Idiopathic                     |
| S05               | 66-70 | F | 4  | CI422  | Family history, idiopathic     |
| S06               | 71-75 | M | 4  | CI522  | Idiopathic                     |
| S07               | 81-85 | M | 3  | CI532  | Otitis media                   |
| S08               | 86-90 | M | 5  | CI522  | Idiopathic                     |
| S09               | 76-80 | F | 6  | CI522  | Skull trauma                   |
| S10<br>(dropout)  | -     | - | -  | -      | -                              |
| S11               | 81-85 | M | 5  | CI512  | Family history,<br>schwannoma  |
| S12               | 76-80 | M | 8  | CI422  | Idiopathic                     |
| S13               | 66-70 | M | 5  | CI522  | Auditory neuropathy            |
| S14               | 36-40 | F | 8  | CI422  | Congenital                     |
| S15               | 66-70 | M | 3  | CI512  | Sudden deafness,<br>idiopathic |
| S16               | 76-80 | M | 12 | CI512  | Unknown                        |
| S17<br>(excluded) | -     | - | -  | -      | -                              |
| S18               | 66-70 | F | 7  | CI532  | Family history                 |
| S19<br>(excluded) | -     | - | -  | -      | -                              |
| S20               | 66-70 | F | 10 | CI422  | Family history, idiopathic     |
| S21               | 56-60 | F | 12 | CI24RE | Meningitis                     |
| S22               | 51-55 | F | 18 | CI24RE | Vestibular schwannoma          |

|     |       |   |   |       |                                        |
|-----|-------|---|---|-------|----------------------------------------|
| S23 | 71-75 | M | 7 | CI512 | Skull trauma                           |
| S24 | 66-70 | F | 5 | CI532 | Congenital, rubella                    |
| S25 | 71-75 | F | 7 | CI522 | Radiotherapy for vestibular schwannoma |
| S26 | 66-70 | F | 4 | CI422 | DFNA-9                                 |
| S27 | 76-80 | M | 7 | CI522 | Sudden deafness, idiopathic            |

134

135 The study was submitted to the ethical committee, where it was approved and assessed as not falling  
136 under the jurisdiction of the Medical Research Involving Human Subjects Act (WMO) (NL-number:  
137 NL80521.091.22). Recruitment and testing took place at Radboud university medical center between  
138 2022 and 2023.

139 During Visit 1, each participant underwent a test battery aimed at collecting a detailed dataset of their  
140 hearing capabilities. This battery included aided Pure Tone Audiometry (PTA), Spectrotemporal  
141 Sensitivity Assessment (SSA, (Van Opstal & Noordanus, 2023)), Phoneme Recognition in Quiet (PRQ,  
142 detailed below), Consonant-Vowel-Consonant (CVC, (Bosman & Smoorenburg, 1995)), and Digits  
143 Triplet Test (Smits et al., 2013). All tests except Pure Tone Audiometry were streamed via Direct Audio  
144 Cable (De Graaff et al., 2016) at a level of 65 input-related dBA to a Nucleus™ 6 test processor loaded  
145 with the participant's most used MAP; Pure Tone Audiometry was instead performed in free-field using  
146 the modified Hughson-Westlake staircase procedure and ensuring the blocking of the contralateral ear  
147 in the case of residual hearing. The computer used for running all tests except PTA was a Lenovo  
148 Thinkpad T440 (Lenovo, Hong Kong, Hong Kong), connected to a RME Fireface UC external sound card  
149 (RME, Germany) to ensure consistent audio levels. Calibration was performed by directly reading the  
150 DSP input levels with a tool provided by Cochlear Ltd. and comparing streamed levels vs levels as  
151 acquired with the processor placed on a mannequin in a calibrated free field in a sound room. PTA was



152 performed according to clinical routine on a calibrated clinical audiometer in a sound booth or quiet  
153 consultation room.

154 The data collected from the SSA and the DTT is not analysed and presented in this paper, as the goal  
155 was to investigate differences between phoneme and word tests; the results of those two tests were  
156 found to not be sufficiently granular for the purposes of investigating phoneme recognition. In the PRQ  
157 test, participants listened to triphones of the form /hVt/ or /aCa/, where V represents vowels or  
158 diphthongs (ɑ, a, au, ε, e, ei, ø, ɪ, i, ɔ, u, o, ʏ, œy, y) and C represents consonants (b, d, f, ɣ, h, j, k, l, m, n,  
159 p, r, s, t, v, w, z) in the Dutch language. The participants were instructed to indicate what triphone they  
160 heard from the closed set of all possible options (vowels and consonants tested separately). The full set  
161 was presented in random order, 8 times for each consonant and 6 times for each vowel. The test  
162 software was developed specifically for this study using Python 3.

163 In the CVC test, the participants heard 15 lists of 12 meaningful Dutch CVC words each, taken from the  
164 Nederlandse Vereniging Audiologie (NVA) word list (Bosman & Smoorenburg, 1992), and were  
165 required to type what was heard as a response. This was then automatically converted into a triplet of  
166 phonemes in order to investigate errors on a phonemic level rather than judging words only as ‘correct’  
167 or ‘incorrect’. The software for the CVC test was developed by Cochlear Ltd. and was previously  
168 validated in a clinical study (de Graaff et al., 2018). For further information on the tests itself, refer to  
169 the protocol as registered on <https://clinicaltrials.gov/study/NCT05307952>.

170 Both tests produced data points in the same format: arrays of stimulus-response pairings where the  
171 stimulus is the phoneme being presented, and the response is the phoneme the participant reported  
172 hearing. These arrays made up the primary outcome of the visit. In order to extract human-readable  
173 information from these data points, several data transformation techniques were applied. These  
174 include the calculation of accuracy (defined as the percentage of correctly identified phonemes),  
175 fitness (also describable as weighted accuracy, described in detail below), and error dispersion (defined  
176 in information theory as “the effective number of error classes per stimulus token” (Van Son, 1995)).

177 The measure of fitness was defined as  $1 - d(stim, resp)$  where 'stim' is the presented phoneme and  
178 'resp' is the response. The distance function  $d$  is defined as the perceptual distance between the  
179 stimulus and the response, in such a way that if the stimulus and the response share some phonetic  
180 features, they are marked as being closer than ones that differ completely. The features of phonemes  
181 are those defined by the International Phonetic Association: voicing, place and manner for consonants,  
182 openness, place and rounding for vowels (International Phonetic Association, 1999). For instance, the  
183 distance between /p/ and /t/ can be set as 0.33 as they are both unvoiced plosives which only differ in  
184 place, while the distance between /p/ and /z/ is the maximum of 1, as they differ in voicing, place, and  
185 manner. In simple terms, fitness is lower when phonemes that are very different from each other are  
186 confused. The details of the implementation can be found in the supplemental materials. It is worth  
187 noting that, by definition, fitness dominates accuracy, i.e., for any given speech test, the fitness will  
188 always be higher than the accuracy. This is because every error is marked as a zero when calculating  
189 accuracy, while partial scores are possible when calculating fitness.

190 The data analysis aimed to compare the PRQ and CVC data, looking at correlations and differences  
191 between phoneme and word tests. This was done first by calculating the correlation coefficients  
192 between accuracy, fitness, and error dispersion in PRQ and CVC for each participant. The goal of this  
193 was to highlight how accuracy, fitness, and error dispersion scores can be useful for describing  
194 individual error patterns.

195 In order to assess within-visit test-retest reliability, random sampling was performed, splitting the data  
196 for each visit in half and checking for a significant change in accuracy. The test was repeated ten times  
197 and the results were averaged to reduce the chance of randomly selecting a split and returning a  
198 spurious result.

199 Next, significant differences between the scores' distributions were investigated using the Wilcoxon  
200 signed rank test for paired samples. Finally, the correlation between accuracy in vowels and  
201 consonants was calculated for both PRQ and CVC. Results across the test are considered significant if

202 their p-values are lower than 0.05 after Bonferroni-Holm correction (performed using (Gaetano, 2013)  
203 ). All reported p-values have been adjusted in this way.

## 204 Results

### 205 Overview and normality test

206 The means, medians, and standard deviations of the computed measures can be found in Table 2.  
207 Using the Shapiro-Wilk test for normality, we found that the assumption of normality did not hold for  
208 fitness in vowels, either for PRQ or CVC tests, and for the error dispersion of consonants in CVC tests.  
209 For this reason, the non-parametric Wilcoxon test for paired samples was used instead of a parametric  
210 one.

211 *Table 2: Aggregate measures and results of the Shapiro-Wilk test for each computed variable. Values below the 0.05*  
212 *significance threshold are marked with an asterisk (\*)*

| Variable                              | Mean  | Median | Standard deviation | P-value          |
|---------------------------------------|-------|--------|--------------------|------------------|
| Accuracy of PRQ vowels                | 69.13 | 72.06  | 16.49              | 0.09             |
| Fitness of PRQ vowels                 | 91.75 | 93.43  | 5.43               | <b>0.02*</b>     |
| Error dispersion of PRQ vowels        | 0.68  | 0.58   | 0.35               | 0.20             |
| Accuracy of CVC vowels                | 82.49 | 86.78  | 13.45              | 0.07             |
| Fitness of CVC vowels                 | 95.84 | 96.80  | 3.90               | <b>&lt;0.01*</b> |
| Error dispersion of CVC vowels        | 1.09  | 1.10   | 0.70               | 0.19             |
| Accuracy of PRQ consonants            | 66.62 | 69.12  | 19.45              | 0.33             |
| Fitness of PRQ consonants             | 82.43 | 84.56  | 12.18              | 0.15             |
| Error dispersion of PRQ consonants    | 0.96  | 0.88   | 0.69               | <b>0.02*</b>     |
| Accuracy of CVC consonants            | 78.56 | 76.21  | 13.51              | 0.06             |
| Fitness of CVC consonants             | 89.09 | 88.85  | 7.12               | 0.11             |
| Error dispersion of CVC consonants    | 1.57  | 1.71   | 0.76               | 0.68             |
| Accuracy of PRQ vowels and consonants | 67.59 | 71.00  | 16.81              | 0.35             |
| Fitness of PRQ vowels and consonants  | 85.61 | 87.95  | 9.30               | 0.08             |

|                                               |       |       |       |      |
|-----------------------------------------------|-------|-------|-------|------|
| Error dispersion of PRQ vowels and consonants | 0.84  | 0.76  | 0.51  | 0.08 |
| Accuracy of CVC vowels and consonants         | 79.74 | 79.84 | 13.34 | 0.07 |
| Fitness of CVC vowels and consonants          | 91.13 | 91.26 | 6.01  | 0.11 |
| Error dispersion of CVC vowels and consonants | 1.40  | 1.56  | 0.71  | 0.57 |

213

#### 214 Correlation analysis – PRQ versus CVC scores

215 Error: Reference source not found shows the results of the CVC and PRQ tests for each subject. PRQ  
 216 and CVC scores correlate strongly in all of accuracy (Pearson’s  $r$ : 0.90;  $p$ -value < 0.001), fitness  
 217 (Pearson’s  $r$ : 0.87;  $p$ -value < 0.001) and error dispersion (Pearson’s  $r$ : 0.82;  $p$ -value < 0.001). These  
 218 correlations remain present also when considering only vowels or only consonants.

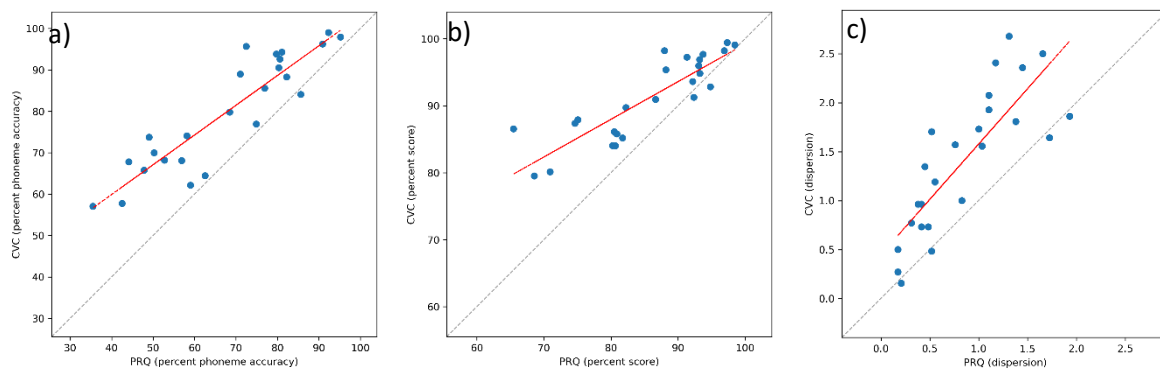

Figure 1: Distributions of PRQ and CVC scores for accuracy (a), fitness (b) and error dispersion (c). The red line indicates a linear regression through the data, the dotted grey line is the diagonal line where both scores are equal.

219 CVC tests results have a significantly higher accuracy (Wilcoxon’s  $p$ -value < 0.001), fitness (Wilcoxon’s  
 220  $p$ -value < 0.001) and error dispersion (Wilcoxon’s  $p$ -value < 0.001) than PRQ test results. The average  
 221 accuracy, fitness, and error dispersion of CVC tests were 80%, 91%, and 1.4, respectively; those of PRQ  
 222 tests were 68%, 86%, and 0.84.

223 In order to ensure that this difference in error dispersion was not linked to the number of phonemes  
 224 presented in CVC being higher than that of PRQ, random sampling was used to repeat the test 10 times  
 225 using a randomly selected number of CVC phonemes, equal in number and in vowels/consonants

226 percentage to the PRQ ones. The mean  $p$ -value of these ten randomly sampled tests was 0.044, which  
227 is higher (due to the much reduced sample size) but still significant.

228 The random sampling aimed at investigating test-retest reliability reported no significant change in the  
229 distribution of accuracy between any of the subsamples (the average  $p$ -value for a Wilcoxon test being  
230 0.54).

231 Error: Reference source not found shows the data split between consonant and vowel scores.  
232 Significant correlations between the accuracies of the consonants vs vowels were found both in PRQ  
233 (Pearson's  $r$ : 0.57;  $p$ -value: 0.002) and CVC (Pearson's  $r$ : 0.95;  $p$ -value < 0.001).

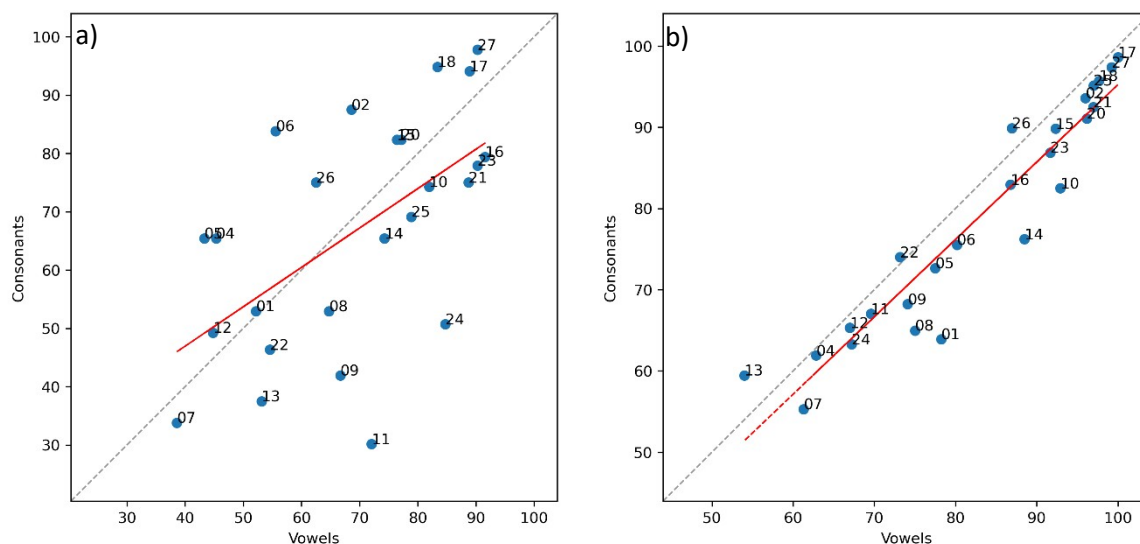

Figure 2: Distribution of accuracy in vowels and consonants for PRQ (a) and CVC (b) tests. The red line indicates a linear regression through the data, the dotted grey line is the diagonal line where both scores are equal. The numbers are Subject IDs.

### 234 Correlation analysis – Fitness and Error Dispersion

235 Figure 3 shows that fitness correlated strongly and positively with accuracy (Pearson's  $r$ : 0.97;  $p$ -value <  
236 0.001).

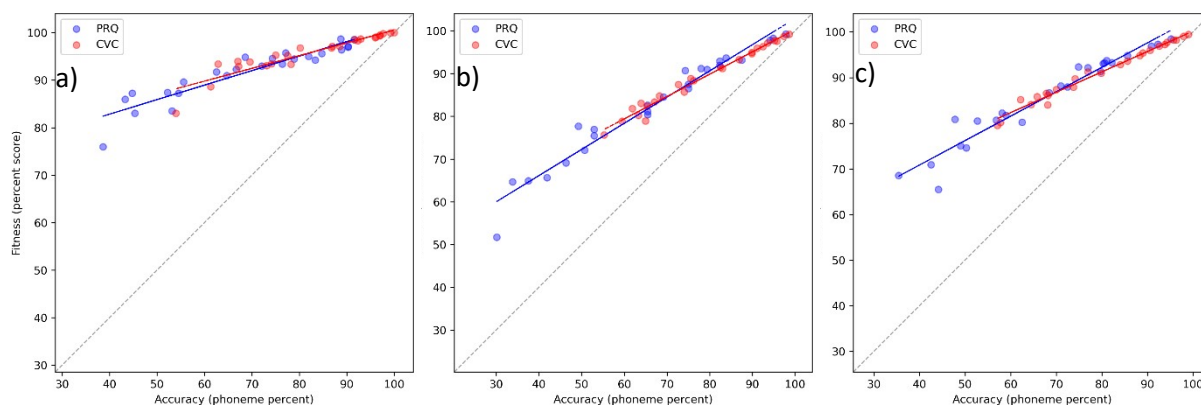

Figure 3: Distribution of fitness and accuracy for vowels (a), consonants (b) and overall (c). In these graphs the PRQ and CVC data is split by colour. The blue and red lines represent the linear regressions of PRQ and CVC data respectively. The dotted grey line is the diagonal line where both scores are equal.

237 Figure 4 shows that error dispersion correlates negatively with accuracy (Pearson's  $r$ : -0.61;  $p$ -value <  
238 0.001).

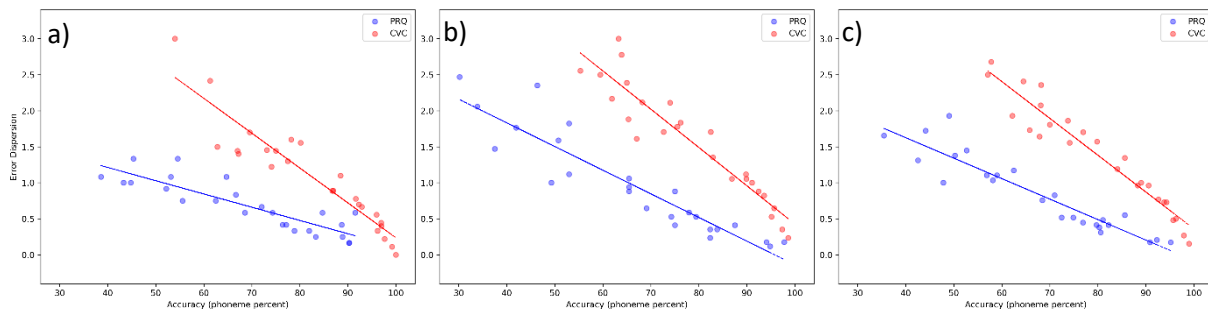

Figure 4: Distribution of error dispersion and accuracy for vowels (a), consonants (b) and overall (c). In these graphs the PRQ and CVC data is split by colour. The blue and red lines represent the linear regressions of PRQ and CVC data respectively. The dotted grey line is the diagonal line where both scores are equal.

### 239 Power analysis

240 Using the G\*Power software (Faul et al., 2007) to calculate the achieved power, it was found to be  
241 higher than 0.95 for each computer parameter, with the exception of the correlation between vowels  
242 and consonants for PRQ, where the achieved power was 0.91. This is usually considered to be a very  
243 high statistical power, resulting in a very low likelihood of a Type 1 error.

### 244 Discussion

245 In this paper we have shown how, within the study participants, Phoneme Recognition in Quiet test  
246 scores differ from Consonant-Vowel-Consonants ones, having on average lower scores and more  
247 consistent error patterns (as shown by the lower error dispersion scores).

248 We have also shown that different measures, such as fitness and error dispersion, can provide  
249 additional information on a CI user's speech recognition; we believe that there is a strong case to be  
250 made for the use of multiple scores (such as the aforementioned fitness and error dispersion) in clinical  
251 practice, delivering more granular insights to clinicians on their patients' speech understanding. The  
252 strong correlation of fitness with accuracy is expected as the former dominates the latter and both  
253 measures are influenced by the number of errors made. However, in Figure 3, it is possible to see  
254 participants whose results are placed at a certain distance from the regression line, and for these  
255 comparing fitness and accuracy may be insightful. If the fitness of a participant's PRQ test is close to the

256 accuracy, it means that the participant is making large mistakes, confounding very different phonemes.  
257 A deeper analysis of their errors might then provide insight into their issues and, according to our  
258 hypothesis, make it so that an intervention could be designed to provide them with more easily  
259 recognisable cues. Conversely, a larger difference between fitness and accuracy means that the  
260 participant is confusing phonemes that are similar to each other, and they might be able to overcome  
261 this issue with practice if the differences between the cues of the confused phonemes are too small to  
262 intervene upon reliably. Furthermore, smaller errors (i.e., confusions between more similar  
263 phonemes) should be easier for a subject to correct when making use of contextual cues, such as in a  
264 meaningful sentence.

265 The negative correlation of error dispersion with accuracy can be explained by the fact that the fewer  
266 errors a CI user is making, the lower the probability will be that those errors distribute into a high  
267 number of categories. In a similar way to fitness, therefore, error dispersion is a measure that should  
268 not be interpreted by itself, but in relation to accuracy.

269 The three scores taken together can provide clinicians with more detailed information on their  
270 patients' individual issues. A participant who, for example, has difficulties distinguishing similar  
271 phonemes such as /i/ and /e/ might be characterized by a fitness score significantly higher than  
272 accuracy (since the phonemes being mistaken are similar) and a low error dispersion score (since the  
273 errors are consistently made between those phonemes). Conversely, a participant who experiences  
274 difficulties with recognizing phonemic cues would show a higher error dispersion score; those issues  
275 might be addressed with training exercises aimed at practicing their phoneme discrimination and  
276 recognition capabilities (Philpott, Philips, Tromp, et al., 2023).

277 Considering the mechanics of speech comprehension can help interpret the differences between these  
278 tests. According to Erber's hierarchy (Erber, 1977), there are four steps involved in listening: Detection,  
279 Discrimination, Recognition and Comprehension. By using meaningful words, CVC tests engage all skills  
280 involved in each of these steps, including cognition. Instead, PRQ tests, which use meaningless

281 triphones, only involve the first three steps. CVC tests, by making use of cognition and top-down  
282 processes and being influenced by co-articulation, may mask certain auditory errors and cause others  
283 to appear. Subjects are told to expect meaningful words; therefore, they will correct perceptual errors,  
284 increasing the accuracy of the test. Sometimes, however, they might introduce non-perceptual errors  
285 by reporting a completely wrong, but meaningful word, e.g. (using English words for the sake of non-  
286 Dutch-speaking readers), mishearing the word 'TOP' as 'TOG' and reporting hearing 'DOG' instead.

287 The different correlations of words with consonants in PRQ and CVC could also be interpreted in a  
288 similar way. Considering that the CVC words are meaningful, correctly identifying the consonants in a  
289 word provides additional cues for identifying the vowels and vice versa. Conversely, in PRQ the  
290 participant can only rely on auditory cues. For instance, this could mean that a participant who  
291 perceives spectral components well but has issues with temporal ones might perform well in vowel  
292 recognition and more poorly in consonant recognition, which features temporal components more  
293 prominently.

294 These results would suggest that PRQ is an effective way to evaluate how a CI user experiences speech  
295 at a phonemic level, limiting the influence of co-articulation as well as cognition and comprehension  
296 skills. Arguably, reducing the effect of cognition might benefit clinicians aiming to adjust CI users'  
297 fitting, as the test can help identify bottom-up errors at a perceptual level. These low-level errors are  
298 the ones which may be more effectively addressed by adjusting the CI user's fitting. In contrast, CVC  
299 tests would be useful for replicating more closely speech in everyday life.

300 Another topic that may be further investigated is the implementation of phoneme tests at home. It  
301 would be little effort to implement the PRQ test on a mobile application and let CI users perform it at  
302 home; this would let clinicians have an overview of their patients' speech recognition issues without  
303 devoting time to administering the test in a clinical environment. Research has shown that at-home  
304 tests have the potential to be as reliable as those run in a clinic (van Wieringen et al., 2021; Wasmann  
305 et al., 2024).



306 Finally, when considering how to assist a CI user optimally, the authors would recommend using a  
307 combination of accuracy, fitness, and error dispersion for both PRQ and CVC tests. This approach aims  
308 to paint a clearer picture of their individual difficulties in quiet. These scores might be further  
309 integrated by data-savvy clinicians with Confusion Matrices to pinpoint the phonemes that each  
310 participant has the most difficulties with.

### 311 [Limitations of the study](#)

312 While PRQ appears to be a reliable test to evaluate CI users' ability to identify phonemes without the  
313 additional variability introduced by co-articulation and cognition, it is worthwhile to take some time to  
314 discuss its limits. First, as the current study only included phonemes in quiet, results cannot be  
315 translated to speech recognition in noise. A follow-up to this study investigating whether these results  
316 hold for tests in noise is needed. Judging from previous studies (Goldsworthy et al., 2013), we can  
317 expect both PRQ and CVC scores to deteriorate with the introduction of noise; however, there would  
318 be merit in investigating which of the scores is most affected, and whether certain subsets of  
319 phonemes are more impacted by noise.

320 Second, the responses being presented as a multiple-choice test might introduce a form of McGurk  
321 effect (McGurk & MacDonald, 1976), inducing participants to report hearing phonemes that they read  
322 but did not hear. Similarly, they may develop a subconscious bias, repeatedly choosing one phoneme  
323 (for instance, the first one of the top row) when uncertain about what they heard.

324 Third, the test population consisted entirely of postlingually deafened, experienced CI users. A similar  
325 study using prelingually deafened or newly implanted CI users might show different results. The study  
326 by Magits et al. (Magits et al., 2023) included newly implanted subjects and found no differences  
327 between inexperienced and experienced users, so it may be worthwhile to check whether these results  
328 hold true for phoneme tests.

329 Finally, test-retest reliability needs further investigation in the context of multiple visits, and potentially  
330 in the context of self-administered tests over a long period.

## 331 Conclusion

332 This paper presented Phoneme Recognition in Quiet testing as a valid integration to Consonant-Vowel-  
333 Consonant Speech Audiometry testing. We showcased how the two tests seem to measure different  
334 steps in the Erber hierarchy, respectively Recognition and Comprehension, and suggested that a  
335 framework based on the use of multiple measures (accuracy, fitness, and error dispersion) over both  
336 kinds of tests might provide audiologists with deeper insights into their patients' unique and individual  
337 difficulties with speech recognition.

338 Further papers on the experimental parts of the AuDiET study will follow to investigate whether this  
339 data-driven, individualized approach to fitting and training can improve the post-implantation follow-  
340 up.

## 341 Ethics Declarations

### 342 Employment

343 Enrico Migliorini, Bastiaan van Dijk and Birgit Philips are employed by Cochlear Limited.

### 344 Funding

345 Enrico Migliorini's PhD programme is MOSAICS; MOSAICS is a European Industrial Doctorate project  
346 funded by the European Union's Horizon 2020 framework programme for research and innovation  
347 under the Marie Skłodowska-Curie Grant Agreement No. 860718.

## 348 Ethics approval

349 The study was carried on in conformity with the 1964 Declaration of Helsinki, the EU GDPR and all  
350 applicable guidelines for the Kingdom of the Netherlands and Radboud university medical center.  
351 The protocol was approved by Radboud university medical center's METC.

## 352 Informed Consent

353 All participants signed an informed consent module concerning their tests and gave explicit permission  
354 for their anonymous data to be shared.

## 355 Bibliography

- 356 Blamey, P., Artieres, F., Bařkent, D., Bergeron, F., Beynon, A., Burke, E., Dillier, N., Dowell, R., Fraysse,  
357 B., Gallégo, S., Govaerts, P. J., Green, K., Huber, A. M., Kleine-Punte, A., Maat, B., Marx, M.,  
358 Mawman, D., Mosnier, I., O'Connor, A. F., ... Lazard, D. S. (2013). Factors affecting auditory  
359 performance of postlinguistically deaf adults using cochlear implants: an update with 2251  
360 patients. *Audiology & Neuro-Otology*, *18*(1), 36–47. <https://doi.org/10.1159/000343189>
- 361 Bond, M., Mealing, S., Anderson, R., Elston, J., Weiner, G., Taylor, R. S., Hoyle, M., Liu, Z., Price, A., &  
362 Stein, K. (2009). The effectiveness and cost-effectiveness of cochlear implants for severe to  
363 profound deafness in children and adults: a systematic review and economic model. *Health*  
364 *Technology Assessment (Winchester, England)*, *13*(44). <https://doi.org/10.3310/HTA13440>
- 365 Bosman, A. J., & Smoorenburg, G. F. (1992). *Woordenlijst voor spraakaudiometrie*. Nederlandse  
366 Vereniging Voor Audiologie, Utrecht. [https://scholar.google.com/scholar\\_lookup?](https://scholar.google.com/scholar_lookup?title=Woordeenlijst+Voor+Spraakaudiometrie&author=A.J.+Bosman&author=G.F.+Smoorenburg&publication_year=1992&)  
367 [title=Woordeenlijst+Voor+Spraakaudiometrie&author=A.J.+Bosman&author=G.F.](https://scholar.google.com/scholar_lookup?title=Woordeenlijst+Voor+Spraakaudiometrie&author=A.J.+Bosman&author=G.F.+Smoorenburg&publication_year=1992&)  
368 [+Smoorenburg&publication\\_year=1992&](https://scholar.google.com/scholar_lookup?title=Woordeenlijst+Voor+Spraakaudiometrie&author=A.J.+Bosman&author=G.F.+Smoorenburg&publication_year=1992&)
- 369 Bosman, A. J., & Smoorenburg, G. F. (1995). Intelligibility of Dutch CVC syllables and sentences for  
370 listeners with normal hearing and with three types of hearing impairment. *Audiology : Official*  
371 *Organ of the International Society of Audiology*, *34*(5), 260–284.  
372 <https://doi.org/10.3109/00206099509071918>
- 373 Craddock, L., Cooper, H., van de Heyning, P., Vermeire, K., Davies, M., Patel, J., Cullington, H., Ricaud,  
374 R., Brunelli, T., Knight, M., Plant, K., Cafarelli Dees, D., & Murray, B. (2003). Comparison  
375 between NRT-based MAPs and behaviourally measured MAPs at different stimulation rates--a  
376 multicentre investigation. *Cochlear Implants International*, *4*(4), 161–170.  
377 <https://doi.org/10.1179/CIM.2003.4.4.161>
- 378 de Graaff, F., Huysmans, E., Merkus, P., Theo Goverts, S., & Smits, C. (2018). Assessment of speech  
379 recognition abilities in quiet and in noise: a comparison between self-administered home  
380 testing and testing in the clinic for adult cochlear implant users. *International Journal of*  
381 *Audiology*, *57*(11), 872–880. <https://doi.org/10.1080/14992027.2018.1506168>
- 382 De Graaff, F., Huysmans, E., Qazi, O. U. R., Vanpoucke, F. J., Merkus, P., Goverts, S. T., & Smits, C.  
383 (2016). The Development of Remote Speech Recognition Tests for Adult Cochlear Implant  
384 Users: The Effect of Presentation Mode of the Noise and a Reliable Method to Deliver Sound in

- 385 Home Environments. *Audiology & Neuro-Otology*, 21 Suppl 1(1), 48–54.  
386 <https://doi.org/10.1159/000448355>
- 387 de Vos, J. J., Biesheuvel, J. D., Briaire, J. J., Boot, P. S., van Gendt, M. J., Dekkers, O. M., Fiocco, M., &  
388 Frijns, J. H. M. (2018). Use of Electrically Evoked Compound Action Potentials for Cochlear  
389 Implant Fitting: A Systematic Review. *Ear and Hearing*, 39(3), 401–411.  
390 <https://doi.org/10.1097/AUD.0000000000000495>
- 391 Erber, N. (1977). Evaluating speech-perception ability in hearing impaired children. In *Childhood*  
392 *Deafness* (pp. 173–181). Grune & Stratton.
- 393 Faul, F., Erdfelder, E., Lang, A. G., & Buchner, A. (2007). G\*Power 3: a flexible statistical power  
394 analysis program for the social, behavioral, and biomedical sciences. *Behavior Research*  
395 *Methods*, 39(2), 175–191. <https://doi.org/10.3758/BF03193146>
- 396 Gaetano, J. (2013). *Holm-Bonferroni sequential correction: an Excel Calculator*.
- 397 Goldsworthy, R. L., Delhorne, L. A., Braid, L. D., & Reed, C. M. (2013). Psychoacoustic and Phoneme  
398 Identification Measures in Cochlear-Implant and Normal-Hearing Listeners. *Trends in*  
399 *Amplification*, 17(1), 27. <https://doi.org/10.1177/1084713813477244>
- 400 Grasmeder, M. L., Verschuur, C. A., van Besouw, R. M., Wheatley, A. M. H., & Newman, T. A. (2019).  
401 Measurement of pitch perception as a function of cochlear implant electrode and its effect on  
402 speech perception with different frequency allocations. *International Journal of Audiology*,  
403 58(3), 158–166. <https://doi.org/10.1080/14992027.2018.1516048>
- 404 Holmes, A. E., Shrivastav, R., Krause, L., Siburt, H. W., & Schwartz, E. (2012). Speech based  
405 optimization of cochlear implants. *International Journal of Audiology*, 51(11), 806–816.  
406 <https://doi.org/10.3109/14992027.2012.705899>
- 407 International Phonetic Association. (1999). *Handbook of the International Phonetic Association: A*  
408 *guide to the use of the International Phonetic Alphabet*. Cambridge University Press.
- 409 Jiam, N. T., Gilbert, M., Cooke, D., Jiradejvong, P., Barrett, K., Caldwell, M., & Limb, C. J. (2019).  
410 Association Between Flat-Panel Computed Tomographic Imaging-Guided Place-Pitch Mapping  
411 and Speech and Pitch Perception in Cochlear Implant Users. *JAMA Otolaryngology-- Head &*  
412 *Neck Surgery*, 145(2), 109–116. <https://doi.org/10.1001/JAMAOTO.2018.3096>
- 413 Kurz, A., Herrmann, D., Hagen, R., & Rak, K. (2023). Using Anatomy-Based Fitting to Reduce  
414 Frequency-to-Place Mismatch in Experienced Bilateral Cochlear Implant Users: A Promising  
415 Concept. *Journal of Personalized Medicine*, 13(7). <https://doi.org/10.3390/JPM13071109>
- 416 Magits, S., Boon, E., De Meyere, L., Dierckx, A., Vermaete, E., Francart, T., Verhaert, N., Wouters, J., &  
417 Van Wieringen, A. (2023). Comparing the Outcomes of a Personalized Versus Nonpersonalized  
418 Home-Based Auditory Training Program for Cochlear Implant Users. *Ear and Hearing*, 44(3),  
419 477–493. <https://doi.org/10.1097/AUD.0000000000001295>
- 420 McGurk, H., & MacDonald, J. (1976). Hearing lips and seeing voices. *Nature* 1976 264:5588,  
421 264(5588), 746–748. <https://doi.org/10.1038/264746a0>
- 422 Moberly, A. C., Bates, C., Harris, M. S., & Pisoni, D. B. (2016). The Enigma of Poor Performance by  
423 Adults with Cochlear Implants. *Otology & Neurotology : Official Publication of the American*  
424 *Otological Society, American Neurotology Society [and] European Academy of Otology and*  
425 *Neurotology*, 37(10), 1522. <https://doi.org/10.1097/MAO.0000000000001211>
- 426 Moberly, A. C., Lowenstein, J. H., Tarr, E., Caldwell-Tarr, A., Welling, D. B., Shahin, A. J., & Nittrouera,  
427 S. (2014). Do adults with cochlear implants rely on different acoustic cues for phoneme

- 428 perception than adults with normal hearing? *Journal of Speech, Language, and Hearing*  
429 *Research : JSLHR*, 57(2), 566. [https://doi.org/10.1044/2014\\_JSLHR-H-12-0323](https://doi.org/10.1044/2014_JSLHR-H-12-0323)
- 430 Philpott, N., Philips, B., Donders, R., Mylanus, E., & Huinck, W. (2023). Variability in clinicians'  
431 prediction accuracy for outcomes of adult cochlear implant users. *International Journal of*  
432 *Audiology*. <https://doi.org/10.1080/14992027.2023.2256973>
- 433 Philpott, N., Philips, B., Tromp, K., Kramer, S., Mylanus, E., & Huinck, W. (2023). Phoneme Training for  
434 Adult Cochlear Implant Users: A Review of the Literature and Study Protocol. *Journal of Speech,*  
435 *Language, and Hearing Research : JSLHR*, 66(12), 5071–5086.  
436 [https://doi.org/10.1044/2023\\_JSLHR-23-00335](https://doi.org/10.1044/2023_JSLHR-23-00335)
- 437 Pisoni, D. B., Kronenberger, W. G., Harris, M. S., & Moberly, A. C. (2017). Three challenges for future  
438 research on cochlear implants. *World Journal of Otorhinolaryngology - Head and Neck Surgery*,  
439 3(4), 240. <https://doi.org/10.1016/J.WJORL.2017.12.010>
- 440 Smits, C., Theo Goverts, S., & Festen, J. M. (2013). The digits-in-noise test: assessing auditory speech  
441 recognition abilities in noise. *The Journal of the Acoustical Society of America*, 133(3), 1693–  
442 1706. <https://doi.org/10.1121/1.4789933>
- 443 Vaerenberg, B., Smits, C., De Ceulaer, G., Zir, E., Harman, S., Jaspers, N., Tam, Y., Dillon, M., Wesarg,  
444 T., Martin-Bonniot, D., Gärtner, L., Cozma, S., Kosaner, J., Prentiss, S., Sasidharan, P., Briaire, J.  
445 J., Bradley, J., Debruyne, J., Hollow, R., ... Govaerts, P. J. (2014). Cochlear implant programming:  
446 a global survey on the state of the art. *TheScientificWorldJournal*, 2014.  
447 <https://doi.org/10.1155/2014/501738>
- 448 Van Opstal, A. J., & Noordanus, E. (2023). Towards personalized and optimized fitting of cochlear  
449 implants. *Frontiers in Neuroscience*, 17. <https://doi.org/10.3389/FNINS.2023.1183126>
- 450 Van Son, R. (1995). A method to quantify the error distribution in confusion matrices. *EUROSPEECH*.
- 451 van Wieringen, A., Magits, S., Francart, T., & Wouters, J. (2021). Home-Based Speech Perception  
452 Monitoring for Clinical Use With Cochlear Implant Users. *Frontiers in Neuroscience*, 15.  
453 <https://doi.org/10.3389/FNINS.2021.773427>
- 454 Walia, A., Shew, M. A., Lefler, S. M., Ortmann, A. J., Durakovic, N., Wick, C. C., Herzog, J. A., &  
455 Buchman, C. A. (2023). Factors Affecting Performance in Adults With Cochlear Implants: A Role  
456 for Cognition and Residual Cochlear Function. *Otology & Neurotology : Official Publication of*  
457 *the American Otological Society, American Neurotology Society [and] European Academy of*  
458 *Otology and Neurotology*, 44(10), 988–996. <https://doi.org/10.1097/MAO.0000000000004015>
- 459 Warren, S. E., & Atcherson, S. R. (2023). Evaluation of a clinical method for selective electrode  
460 deactivation in cochlear implant programming. *Frontiers in Human Neuroscience*, 17.  
461 <https://doi.org/10.3389/FNHUM.2023.1157673>
- 462 Wasmann, J. W. A., Huinck, W. J., & Lanting, C. P. (2024). Remote Cochlear Implant Assessments:  
463 Validity and Stability in Self-Administered Smartphone-Based Testing. *Ear and Hearing*, 45(1),  
464 239–249. <https://doi.org/10.1097/AUD.0000000000001422>
- 465 Wathour, J., Govaerts, P. J., & Deggouj, N. (2021). Variability of fitting parameters across cochlear  
466 implant centres. *European Archives of Oto-Rhino-Laryngology : Official Journal of the European*  
467 *Federation of Oto-Rhino-Laryngological Societies (EUFOS) : Affiliated with the German Society*  
468 *for Oto-Rhino-Laryngology - Head and Neck Surgery*, 278(12), 4671–4679.  
469 <https://doi.org/10.1007/S00405-020-06572-W>
- 470 Wathour, J., Govaerts, P. J., Lacroix, E., & Naïma, D. (2023). Effect of a CI Programming Fitting Tool  
471 with Artificial Intelligence in Experienced Cochlear Implant Patients. *Otology and Neurotology*,

472 44(3), 209–215. <https://doi.org/10.1097/MAO.0000000000003810>

473 Zeng, F.-G. (2022). Celebrating the one millionth cochlear implant. *JASA Express Letters*, 2(7).  
474 <https://doi.org/10.1121/10.0012825>

475

## 476 Supplemental Material

### 477 Fitness calculation

478 Let  $t$  be a test made of  $n$  presentations of phonemes. Since  $t$  can be described as  $n$  couples of  
479 phonemes  $\{p, q\}$  where  $p$  is the presented phoneme and  $q$  is the given answer. The IPA features of  $p$   
480 and  $q$  (voicing, place, and manner for consonants; rounding, place, and openness for consonants) are  
481 then compared. If  $p$  and  $q$  do not overlap in any of the features, the  $\{p, q\}$  couple is scored 0. If they  
482 overlap in one, the couple is scored  $1/3$ ; if they overlap in two, it is scored  $2/3$ , and if they overlap  
483 completely then  $p = q$ , and the couple is scored 1. The average score over the  $n$  couples in the test  $t$  is  
484 the fitness of  $t$ .
